# Supplementary material for: 小林よしのり『戦争論』のうそ! ([特集]マンガ『戦争論』批判)
Source: Royal Society of Chemistry journal article supplement (doi:10.1039/c9an01271k), 1999-03-01
Supplement: c9an01271k1.pdf [file c9an01271k1.pdf]

## Supporting Information

Target-controlled in-situ formation of G-quadruplex DNAzyme for  
sensitively visual assay of telomerase activity

Yaocai Wang, Luzhu Yang, Yanjun Wang, Wei Liu, Baoxin Li and Yan Jin\*

Key Laboratory of Applied Surface and Colloid Chemistry, Ministry of Education,  
Key Laboratory of Analytical Chemistry for Life Science of Shaanxi Province, School  
of Chemistry and Chemical Engineering, Shaanxi Normal University, Xi'an 710062,  
China

\* Corresponding author: Prof. Yan Jin, Key Laboratory of Applied Surface and  
Colloid Chemistry, Ministry of Education, Key Laboratory of Analytical Chemistry  
for Life Science of Shaanxi Province, School of Chemistry and Chemical  
Engineering, Shaanxi Normal University

Email: jinyan@snnu.edu.cn, Fax: 86-29-81530727, Tel: 86-29-81530726

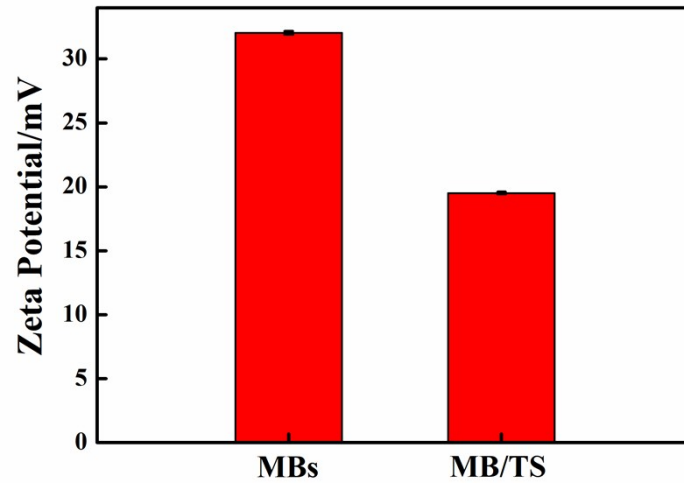

**Fig. S1.** Zeta potential of MBs and MB/TS. Error bars were calculated from three replicates.

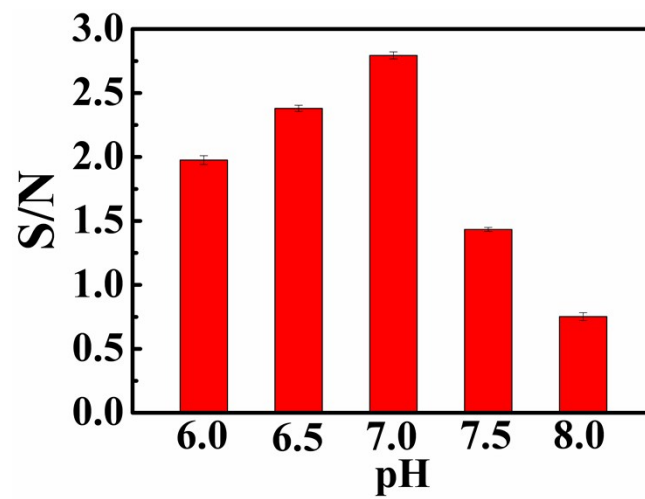

**Fig. S2.** Effect of pH on S/N ratio. Cell extract of 200 HeLa cells was used. Error bars were calculated from three replicates.

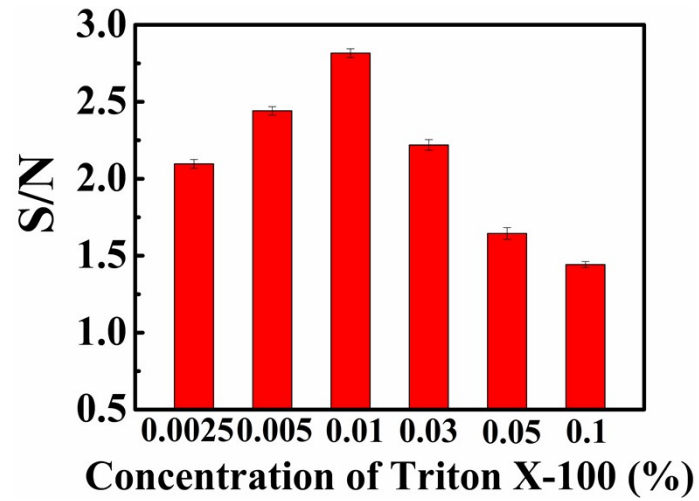

**Fig. S3.** Effect of Triton X-100 concentrations on S/N ratio. Cell extract of 200 HeLa cells was used. Error bars were calculated from three replicates.

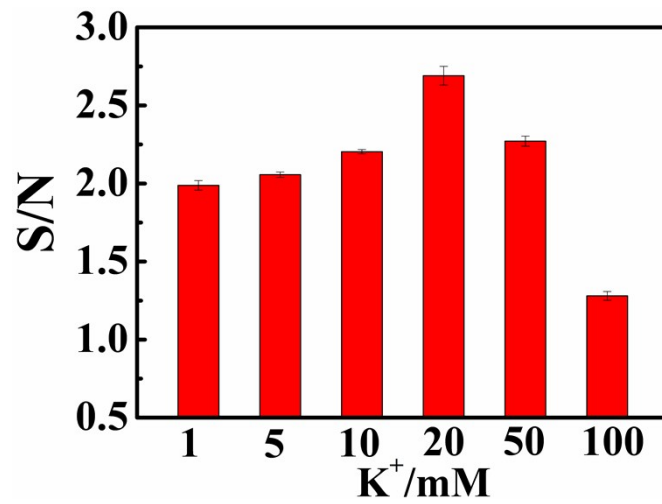

**Fig. S4.** Effect of K<sup>+</sup> concentration on S/N ratio. Cell extract of 200 HeLa cells was used. Error bars were calculated from three replicates.

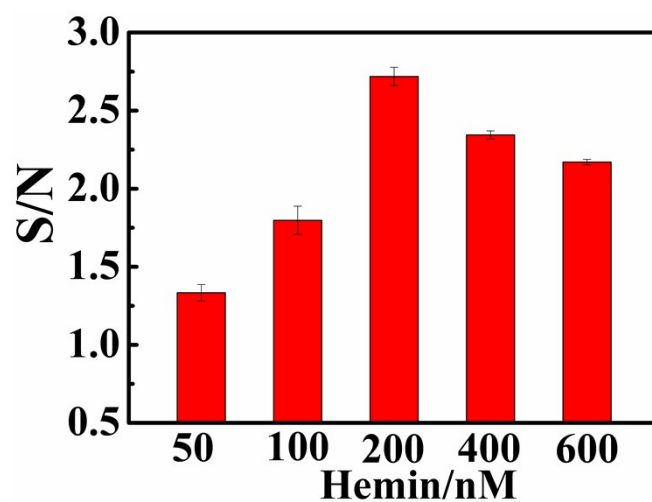

**Fig. S5.** Effect of hemin concentration on S/N ratio. Cell extract of 200 HeLa cells was used. Error bars were calculated from three replicates.

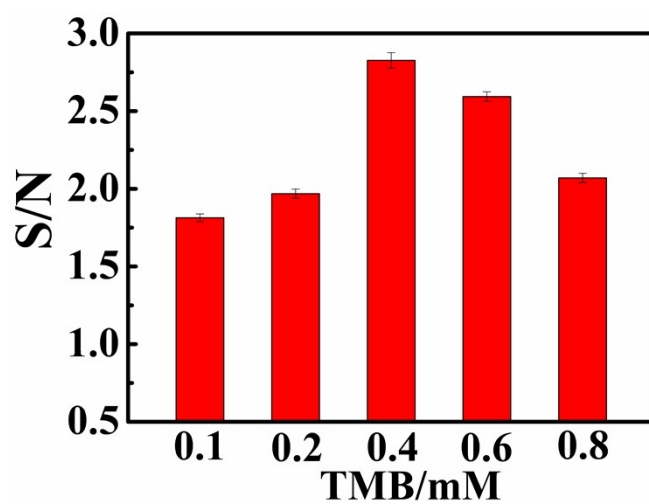

**Fig. S6.** Effect of TMB concentration on S/N ratio. Cell extract of 200 HeLa cells was used. Error bars were calculated from three replicates.

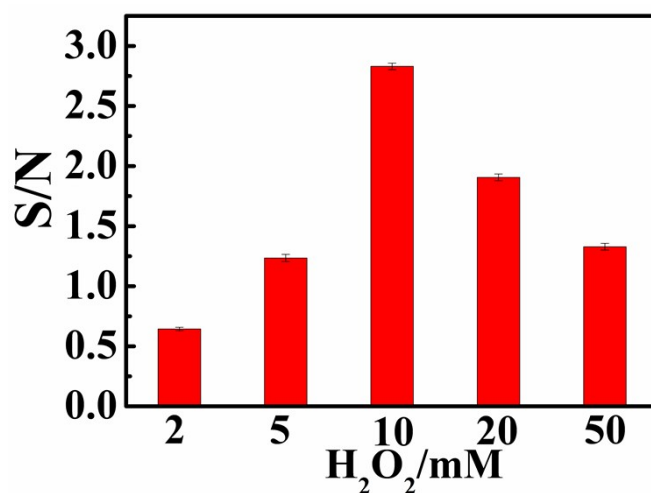

**Fig. S7.** Effect of H<sub>2</sub>O<sub>2</sub> concentration on S/N ratio. Cell extract of 200 HeLa cells was used. Error bars were calculated from three replicates.

Table S1. Comparison of colorimetric assays for detecting telomerase activity.

| Ref. | LOD (naked eye)        | LOD (UV-vis spectrometer) | Detection in complex matrix |
|------|------------------------|---------------------------|-----------------------------|
| (1)  | 10 HeLa cells/ $\mu$ L | 1 HeLa cell/ $\mu$ L      | No                          |
| (2)  | 1000 HeLa cells        | 100 HeLa cells            | No                          |
| (3)  | 6 MCF-7 cells/ $\mu$ L | Not mentioned             | Yes                         |
| (4)  | 100 HL-60 cells/mL     | 29 HL-60 cells/mL         | No                          |
| (5)  | Not mentioned          | 0.2 HeLa cells/ $\mu$ L   | No                          |
| (6)  | Not mentioned          | 27 293T cells/ $\mu$ L    | No                          |
| (7)  | Not mentioned          | 10 cells/mL               | No                          |
| (8)  | Not mentioned          | ~ 500 HeLa cells          | No                          |
| (9)  | Not mentioned          | ~ 200 293T cells/ $\mu$ L | No                          |
| (10) | Not mentioned          | 200 HeLa cells            | No                          |
| (11) | Not mentioned          | 60 HeLa cells/mL          | Yes                         |
| (12) | 20 HeLa cells          | 5 HeLa cell               | Yes                         |
| (13) | Not mentioned          | 90 HeLa cells/mL          | Yes                         |
| (14) | Not mentioned          | 100 HeLa cells            | Yes                         |
| (15) | 20 HeLa cells          | Not mentioned             | Yes                         |

|           |                      |                        |     |
|-----------|----------------------|------------------------|-----|
| (16)      | 250 HeLa cells       | 25 HeLa cells          | Yes |
| This work | 1 HeLa cell/ $\mu$ L | 0.5 HeLa cell/ $\mu$ L | Yes |

## References

- (1) Wang, J. S.; Wu, L.; Ren, J. S.; Qu, X. G. Visualizing Human Telomerase Activity with Primer-Modified Au Nanoparticles. *Small* 2012, 8, 259-264.
- (2) Wang, J. S.; Wu, L.; Ren, J. S.; Qu, X. G. Visual Detection of Telomerase activity with a Tunable Dynamic Range by Using a Gold Nanoparticle Probe-based Hybridization Protection Strategy. *Nanoscale* 2014, 6, 1661-1666.
- (3) Duan, R. X.; Wang, B. Y.; Zhang, T. C.; Zhang, Z. Y.; Xu, S. F.; Chen, Z. F.; Lou, X. D.; Xia, F. Sensitive and Bidirectional Detection of Urine Telomerase Based on the Four Detection-Color States of Difunctional Gold Nanoparticle Probe. *Anal. Chem.* 2014, 86, 9781-9785.
- (4) Zhang, L.; Zhang, S. J.; Pan, W.; Liang, Q. C.; Song, X. Y. Exonuclease I Manipulating Primer-modified Gold Nanoparticles for Colorimetric Telomerase Activity Assay. *Biosens. Bioelectron.* 2016, 77, 144-148.
- (5) Xu, X. W.; Wang, L.; Huang, Y. Q.; Gao, W. S.; Li, K.; Jiang, W. Model-Guided Interface Probe Arrangement for Sensitive Protein Detection. *Anal. Chem.* 2016, 88, 9885-9889.
- (6) Sharon, E.; Golub, E.; Niazov-Elkan, A.; Balogh, D.; Willner, I. Analysis of Telomerase by the Telomeric Hemin/G-Quadruplex Controlled Aggregation of Au Nanoparticles in the Presence of Cysteine. *Anal. Chem.* 2014, 86, 3153-3158.
- (7) Zong, S. F.; Wang, Z. Y.; Chen, H.; Hu, G. H.; Liu, M.; Chen, P.; Cui, Y. P. Colorimetry and SERS Dual-mode Detection of Telomerase Activity: Combining Rapid Screening with High Sensitivity. *Nanoscale* 2014, 6, 1808-1816.
- (8) Xiao, Y.; Pavlov, V.; Niazov, T.; Dishon, A.; Kotler, M.; Willner, I. Catalytic Beacons for the Detection of DNA and Telomerase Activity. *J. Am. Chem. Soc.* 2004, 126, 7430-7431.

- (9) Freeman, R.; Sharon, E.; Teller, C.; Henning, A.; Tzfati, Y.; Willner, I. DNAzyme-Like Activity of Hemin-Telomeric G-Quadruplexes for the Optical Analysis of Telomerase and its Inhibitors. *ChemBioChem* 2010, 11, 2362-2367.
- (10) Li, H.; Fu, H. W.; Zhao, T.; Kong, D. M. Simple, PCR-free Telomerase Activity Detection using G-quadruplex-hemin DNAzyme. *RSC Adv.* 2014, 5, 6475-6480.
- (11) Xu, X. L.; Wei, M.; Liu, Y. J.; Liu, X.; Wei, W.; Zhang, Y. J.; Liu, S. Q. A Simple, Fast, Label-free Colorimetric Method for Detection of Telomerase Activity in Urine by Using Hemin-graphene Conjugates. *Biosens. Bioelectron.* 2017, 87, 600-606.
- (12) Wang, Y. C.; Yang, L. Z.; Wang, Y. J.; Liu, W.; Li, B. X.; Jin, Y. An Ultra-sensitive Colorimetric Assay for Reliable Visual Detection of Telomerase Activity. *Analyst* 2017, 142, 3235-3240.
- (13) Yang, H. T.; Liu, A. R.; Wei, M.; Liu, Y. J.; Lv, B. J.; Wei, W.; Zhang, Y. J.; Liu, S. Q. Visual, Label-Free Telomerase Activity Monitor via Enzymatic Etching of Gold Nanorods. *Anal. Chem.* 2017, 89, 12094-12100.
- (14) Feng, E. D.; Zheng, T. T.; Tian, Y. Dual-Mode Au Nanoprobe Based on Surface Enhancement Raman Scattering and Colorimetry for Sensitive Determination of Telomerase Activity Both in Cell Extracts and in the Urine of Patients. *ACS Sens.* 2019, 4, 211-217.
- (15) Wang, D. N.; Zhang, Y. Z.; Zhao, X. Y.; Xu, Z. R. Plasmonic Colorimetric Biosensor for Visual Detection of Telomerase Activity Based on Horseradish Peroxidase-Encapsulated Liposomes and Etching of Au Nanobipyramids. *Sensor Actuat B-Chem.* 2019, 296, 126646.
- (16) Yu, T.; Zhao, W.; Xu, J. J.; Chen, H. Y. A PCR-Free Colorimetric Strategy for Visualized Assay of Telomerase Activity. *Talanta* 2018, 178, 594-599.
